36 **Key message**

37 *pRbcS-T1* and *pMALD1*, two new trichome-specific promoters of *Nicotiana tabacum*, were  
38 identified and their strength and specificity were compared to those of previously described  
39 promoters in this species.

40

41 **Abstract**

42 *Nicotiana tabacum* has emerged as a suitable host for metabolic engineering of terpenoids and  
43 derivatives in tall glandular trichomes, which actively synthesize and secrete specialized  
44 metabolites. However, implementation of an entire biosynthetic pathway in glandular  
45 trichomes requires the identification of trichome-specific promoters to appropriately drive the  
46 expression of the transgenes needed to set up the desired pathway. In this context, RT-qPCR  
47 analysis was carried out on wild-type *N. tabacum* plants to compare the expression pattern  
48 and gene expression level of *NtRbcS-T1* and *NtMALD1*, two newly identified genes expressed  
49 in glandular trichomes, with those of *NtCYP71D16*, *NtCBTS2 $\alpha$* , *NtCPS2*, and *NtLTPI*, which  
50 were reported in the literature to be specifically expressed in glandular trichomes. The latter  
51 were previously investigated separately, preventing any accurate comparison of their  
52 expression level. We show that *NtRbcS-T1* and *NtMALD1* are specifically expressed in  
53 glandular trichomes like *NtCYP71D16*, *NtCBTS2 $\alpha$* , and *NtCPS2*, while *NtLTPI* was also  
54 expressed in other leaf tissues as well as in the stem. Transcriptional fusions of each of the six  
55 promoters to the *GUS-VENUS* reporter gene were introduced in *N. tabacum* by  
56 *Agrobacterium*-mediated transformation. Most transgenic lines displayed GUS activity in tall  
57 glandular trichomes. In some transgenic lines, except for *pNtLTPI:GUS-VENUS*, this  
58 expression was specific. In other transgenic lines, GUS expression was extended to other  
59 tissues, probably resulting from a position effect during transgene integration. We discuss  
60 alternatives to overcome this lack of tissue specificity in some transgenic lines, should some  
61 of these promoters be used in the context of metabolic engineering in *N. tabacum*.

62

63 **Keywords:** Rubisco small subunit, Major Allergen Mal D 1.0501, Cembratrien-ol Synthase,  
64 Copal-8-ol diphosphate Synthase, Lipid Transfer Protein, Cytochrome P450 oxygenase

## 65 **Introduction**

66 Trichomes, the epidermal outgrowths covering most of aerial plant tissues are found in a  
67 very large number of plant species. Several types of trichomes (unicellular or multicellular,  
68 glandular or non-glandular) can be observed in a single plant species. Among those, glandular  
69 trichomes are characterized by the presence of cells forming a glandular structure that has the  
70 ability to secrete or store large quantities of specialized (also called secondary) metabolites  
71 (e.g., phenylpropanoids, flavonoids, acyl sugars, methylketones, and terpenoids), which  
72 possess antimicrobial and anti-fungal properties or which act as a defense barrier against  
73 herbivorous insects (Schilmiller et al. 2008).

74 The specialized metabolites secreted by glandular trichomes, which might represent up to  
75 17 % of the leaf dry weight in *Nicotiana tabacum* (tobacco), have been largely exploited over  
76 centuries (Wagner et al. 2004). One of their most ancient uses originates from the aromatic  
77 properties and fragrance of some of those secretions referred to as essential oils. Besides,  
78 many of these specialized metabolites constitute an interesting source of pharmaceuticals and  
79 food additives. However, one of the common issues with some specialized metabolites is their  
80 low production yield in their natural host plant (Van Agtmael et al. 1999; Yoon et al. 2013).  
81 Some of them are highly praised molecules only found in a single plant species or even a  
82 single plant cultivar and often at low concentration (e.g., taxol found in *Taxus sp.*, artemisinin  
83 in *Artemisia annua* or cannabinoids in *Cannabis sativa*). Therefore, natural resources are  
84 often insufficient to reach the global need, while the complex stereochemistry of these  
85 compounds often prevents their full chemical synthesis in a cost-effective way.

86 In order to increase the overall yield, metabolic engineering strategies are undertaken to  
87 synthesize such metabolites through homologous or heterologous expression systems (Kirby  
88 and Keasling 2009; Marienhagen and Bott 2013). Advances in plant biotechnology and  
89 increasing knowledge in specialized metabolism also make it possible to exploit plants as  
90 production platforms for specific metabolites. One of the main advantages of such a strategy  
91 is that plants are photoautotrophic organisms, therefore requiring simple and cheap growth  
92 conditions, which accounts for a cost-effective biomass production (Kempinski et al. 2015).  
93 Besides, another benefit of using plant hosts is their ability to deal with membrane proteins  
94 such as P450 enzymes and posttranslational modifications such as glycosylation, two key  
95 features that are frequently limiting in prokaryotic hosts (van Herpen et al. 2010).

96 Among plant specialized metabolites, terpenoids and derivatives are the most abundant in  
97 terms of sheer number and chemical diversity (for review, see Croteau et al. 2000; Bouvier et

98 al. 2005; Gershenzon and Dudareva 2007). Different plant species have been tested to  
99 perform metabolic engineering. From these trials, *N. tabacum* has emerged as one of the most  
100 suitable plant hosts (Moses and Pollier 2013; Lange et al. 2013; Wang et al. 2016). *N.*  
101 *tabacum* synthesizes an important pool of terpenoid precursors (IPP/DMAPP) and, besides  
102 the essential metabolites derived from the isoprenoid biosynthesis pathways, it also produces  
103 a very high amount of a limited range of specialized metabolites (Huchelmann et al. 2017).  
104 This combined to its high biomass, its fast growth rate, its easy genetic transformation and  
105 regeneration make it an interesting host to implement the biosynthesis pathways of terpenoid  
106 compounds and derivatives thereof.

107 However, engineering terpenoid biosynthetic pathways using ubiquitous promoters  
108 frequently leads to severe phenotypes including dwarfism, chlorosis, and decreased seed  
109 production due to the cytotoxicity of these compounds or detrimental impact on the  
110 biosynthesis of essential metabolites (Saxena et al. 2014; Gwak et al. 2017; reviewed in  
111 Huchelmann et al. 2017). To avoid these adverse effects on the plant physiology, a fine  
112 control of the spatiotemporal expression of the transgenes, physically restricting the  
113 biosynthesis of potentially cytotoxic metabolites to specialized organs, is desirable  
114 (Huchelmann et al. 2017). Since glandular trichomes are non-essential organs, which are  
115 involved in the biosynthesis, storage and/or secretion of specialized metabolites and which  
116 naturally evolved to efficiently deal with high concentrations of these metabolites, they make  
117 ideal targets to develop such a metabolic engineering approach. For this purpose,  
118 identification of trichome-specific promoters and therefore of trichome-specific genes is  
119 required.

120 The promoters of four genes from *Nicotiana* species have previously been shown to be  
121 trichome-specific: Cytochrome P450 oxygenase 71D16 (*NtCYP71D16*), Copal-8-ol  
122 diPhosphate Synthase 2 (*NtCPS2*), Lipid Transfer Protein 1 (*NtLTP1*) of *N. tabacum*, as well  
123 as CemBraTrien-ol Synthase 2 $\alpha$  (*NsCBTS2 $\alpha$* ) of *Nicotiana glauca*. All these genes are  
124 exclusively related to specialized metabolism (Wang et al. 2002; Ennajdaoui et al. 2010; Choi  
125 et al. 2012; Sallaud et al. 2012).

126 A proteomic comparison was recently performed in *N. tabacum* between proteins extracted  
127 from tall glandular trichomes, which produce large amounts of terpenes, and those extracted  
128 from other plant organs (Laterre et al. 2017). This led to the identification of 47 proteins that  
129 were more abundant in tall glandular trichomes, the most enriched ones being a putative PR-  
130 10 type pathogenesis-related protein, namely Major Allergen Mal D 1.0501 (MALD1) and a

131 small subunit of ribulose-1,5-bisphosphate carboxylase/oxygenase (RbcS-T1) (Laterre et al.  
132 2017). The transcriptional promoter of a *Nicotiana benthamiana* *RbcS-T* homolog coupled to  
133 a reporter gene was shown to be trichome-specific in leaf tissues (Laterre et al. 2017). In *N.*  
134 *tabacum*, the trichome-specific localization of *NtMALD1* and *NtRbcS-T* transcripts was  
135 supported by semi-quantitative RT-PCR (Harada et al. 2010; Laterre et al. 2017).

136 To limit cytotoxicity issues and/or adverse effects on plant metabolism, elucidating  
137 whether gene promoters reported to be active in glandular trichomes are specific to glandular  
138 trichomes or display a broader activity in plant tissues is critical if those promoters are to be  
139 used in metabolic engineering approaches. The six promoters mentioned above had been  
140 investigated separately, preventing one to compare their transcript levels. In addition, for  
141 some of them, their cell-type specificity monitored by the GUS reporter gene had not been  
142 described in other organs than leaf tissues. Yet, these are key parameters to determine which  
143 are the most suitable ones for metabolic engineering in *N. tabacum* tall glandular trichomes.

144 The present study thus aimed at comparing the expression patterns and expression levels of  
145 *NtCYP71D16*, *NtCBTS2 $\alpha$* , *NtCPS2*, *NtLTP1*, *NtRbS-T1*, and *NtMALD1* promoters in *N.*  
146 *tabacum*. Their transcript levels in trichomes and different organs were compared.  
147 Transcriptional fusions of each of the six promoters to *GUS-VENUS* were expressed in  
148 transgenic *N. tabacum* plants. Most of the lines obtained with the six reporter constructs  
149 displayed GUS activity in the tall glandular trichomes. This expression was trichome-specific  
150 in a few lines, except for *pNtLTP1:GUS-VENUS*, corroborating transcripts data. The other  
151 lines exhibited GUS activity in other tissues, pointing out to random transgene insertion and  
152 positional effects as the most probable causes of such discrepancies. We therefore discuss  
153 alternatives to overcome this lack of tissue specificity in some lines, should some of these  
154 promoters be used in genetic constructs to drive the expression of specific transgenes.

## 155 **Results**

156

157 In a 2D gel analysis of glandular trichome proteins from *N. tabacum*, several spots were  
158 identified as trichome-specific proteins, among which RbcS-T1 and MALD1 (Laterre et al.  
159 2017). The RNA levels of *NtRbcS-T1* and *NtMALD1* as well as of *NtLTP1*, *NtCYP71D16*,  
160 *NtCBTS2 $\alpha$* , and *NtCPS2*, previously reported as genes specifically expressed in tall glandular  
161 trichomes, were compared in trichomes and different other *N. tabacum* organs. To do so,  
162 leaves were frozen in liquid nitrogen and carefully scratched with a brush to collect the  
163 trichomes. RT-qPCR assays were then performed on RNA extracted from trichomes, roots,  
164 trichome-free leaves, and trichome-free stems of six-week-old plants as well as from flowers  
165 of 10-week-old plants. Unlike for leaves and stems, trichomes could not be retrieved from  
166 flower sepals and petals. For each gene, the relative expression level in trichomes was  
167 arbitrarily set to one. The stability of the ubiquitin (*NtUBQ*) and the ATP-synthase  $\beta$ -subunit  
168 (*NtATP2*) control genes used to normalize the data is shown in Supplemental Fig. S1. All six  
169 studied genes showed a significantly ( $p < 0.05$ ) higher relative expression level in isolated  
170 trichomes compared to the levels observed in roots, leaves, stems or flowers (Fig. 1).  
171 *NtCYP71D16*, *NtCBTS2 $\alpha$* , *NtCPS2*, *NtRbcS-T1*, and *NtMALD1* exhibited very low expression  
172 in roots, trichome-free leaves and trichome-free stems, while higher transcript levels were  
173 found for *NtLTP1* in leaves and stems. The expression was high in flowers for the six genes  
174 but, as noted above, trichomes were not removed from these organs.

175 As most of these genes are involved in the biosynthesis (*NtCYP71D16*, *NsCBTS2 $\alpha$* , and  
176 *NtCPS2*) or transport (*NtLTP1*) of specialized metabolites secreted by mature glands, we  
177 wondered whether the leaf developmental stage could impact their expression in trichomes.  
178 Thus, glandular trichomes were isolated from leaves at different developmental stages,  
179 arbitrarily defined by the leaf length:  $< 2.5$  cm (stage I), between 2.5 cm and 6.5 cm (stage II),  
180 between 6.5 cm and 15 cm (stage III), and  $> 15$  cm (stage IV). The transcript levels of the six  
181 genes increased with leaf development (Fig. 2). The opposite trend was observed for  
182 elongation factor  $\alpha$  (*EF1 $\alpha$* ), which peaked at stage I, confirming that the observed increasing  
183 level of all six genes is not an artifact of the normalization method (Supplemental Fig. S2).  
184 While the transcript level of *NtLTP1* appeared stable during leaf development, expression of  
185 the other five genes steadily increased until stage III where it reached a plateau (Fig. 2).  
186 Among them, *NtRbcS-T1* was the gene for which the transcript level increased the most with  
187 leaf development (4-fold increase). Expression of *NtCBTS2 $\alpha$*  and *NtCYP71D16* involved in  
188 the biosynthesis of cembrenes, the major subgroup of diterpenes produced by *N. tabacum*

189 glandular trichomes, also exhibited a large increase (3.8- and 3.6-fold, respectively) (Fig. 2).  
190 A more moderate increase was found for *NtMALDI* (2.6-fold) and *NtCPS2* (2.4-fold)  
191 transcripts, the latter being involved in the biosynthesis of another subgroup of diterpenes,  
192 namely labdanes.

193 The absolute expression levels of all six genes of interest was then determined in isolated  
194 trichomes for developmental stage III using an absolute standard curve method (Fig. 3, see  
195 Material and methods for details). Several control genes, some of which were used to  
196 normalize the relative expression data shown in Figures 1 and 2, were also added to the study  
197 for comparison purposes. Among control genes, the absolute expression levels (Fig. 3) were  
198 in agreement with previously published data in other Solanaceae species (Lu et al. 2012;  
199 Lacerda et al. 2015). Genes involved in cembrene production, *NtCBTS2 $\alpha$*  (78.0 copies/pg),  
200 and *NtCYP71D16* (67.9 copies/pg), were the most expressed genes at stage III (Fig. 3), while  
201 a lower expression was found at this stage for *NtMALDI* (40.8 copies/pg), *NtLTPI* (28.2  
202 copies/pg), *NtCPS2* (labdane diterpenes, 11.1 copies/pg) and *NtRbcS-TI* (5.1 copies/pg).

203 To further confirm the trichome-specific expression pattern observed by RT-qPCR, we  
204 generated transcriptional reporter lines using a *GUS-VENUS* coding sequence. In the 2D gel  
205 analysis which led to the identification of trichome-specific proteins, two spots had been  
206 identified as trichome-specific RbcS (Laterre et al. 2017). At that time, only the *N.*  
207 *benthamiana* genome sequence was available and a RbcS transcription promoter (*pNbRbcS-*  
208 *T*) corresponding to the minor RbcS spot had been retrieved from this species and  
209 characterized (Laterre et al. 2017). Once the sequence of a *N. tabacum* genome became  
210 available, we identified *pNtRbcS-TI* (accession: MG493459.1) as the promoter of the gene  
211 corresponding to the major RbcS spot (*NtRbcS-T1*; accession: DV157962). The *pNtMALDI*  
212 promoter (accession: MG493458.1), corresponding to the *NtMALDI* spot (accession:  
213 FS387666) was identified as well. The *GUS-VENUS* coding sequence was fused to *N.*  
214 *tabacum* genomic fragments of 1993 bp and 1974 bp upstream of the translation initiation  
215 codon of *NtRbcS-TI* and *NtMALDI*, respectively (Fig. 4). For the other genes, the previously  
216 published promoter regions, i.e. 985 bp (*NsCBTS2 $\alpha$* ), 849 bp (*NtLTPI*), 1852 bp  
217 (*NtCYP71D16*), and 1448 bp (*NtCPS2*) (Wang et al. 2002; Ennajdaoui et al. 2010; Choi et al.  
218 2012; Sallaud et al. 2012) were isolated and similarly fused to the *GUS-VENUS* coding  
219 sequence. These constructs were introduced in *N. tabacum* through *Agrobacterium*  
220 *tumefaciens*-mediated transformation. For each construct, 24 to 45 independent T<sub>0</sub> transgenic  
221 lines were generated and their GUS activity was monitored in leaves, stems, and roots of six-  
222 week-old transgenic plants after 16 h of incubation at 37°C to challenge the cell-type



223 specificity (Table 1). GUS expression patterns were then confirmed on T<sub>1</sub> lines. Several  
224 observations can be made. i/ For each promoter, a large majority (83-100%) of the lines  
225 displayed GUS activity in tall glandular trichomes (Table 1). This indicates that appropriate  
226 cis-sequences required for expression in tall glandular trichomes are present in the sequences  
227 fused to the reporter gene. ii/ Some lines displayed strict trichome specificity even after  
228 extended GUS assay (see Table I as well as Figure 5 for *pNtRbcS-TI* and *pMALDI* as well as  
229 for *pNtCYP71D16* as a control). As an exception, none of the *NtLTPI* lines displayed  
230 trichome-specific GUS expression (Table I). This agrees with the RT-qPCR data (Fig. 1). iii/  
231 In many lines, however, GUS activity was also found in other organs such as root, stem, leaf  
232 and/or flower (Table 1). In this case, the expression profile was variable according to the line  
233 (examples are displayed in Figure 6), probably as a consequence of the position effect (see  
234 discussion).



## 235 Discussion

236

### 237 *NtRbS-T1* and *NtMALD1* extend the list of trichome-specific genes in *Nicotiana tabacum*

238 In this project, the tissue-specific expression of six *N. tabacum* genes, namely *NtLTPI*,  
239 *NtCYP71D16*, *NtCBTS2 $\alpha$* , *NtCPS2*, *NtRbS-T1*, and *NtMALD1*, was analyzed. Their trichome-  
240 specific expression at the transcript level had not yet been quantified and compared by RT-  
241 qPCR. We performed this comparison by RT-qPCR, using tall glandular trichome RNA as  
242 well as RNA of different plant organs. Except for *NtLTPI*, all these genes were found to be  
243 specifically expressed in tall glandular trichomes in *N. tabacum* (Fig. 1). Apart from *NtLTPI*,  
244 whose expression was almost constant during leaf development, that of the other five genes  
245 was lower at an early stage of leaf development and reached a maximum at stage III (Fig. 2),  
246 presumably when the specialized metabolism is fully operating. This is also true for *RbcS-T1*  
247 and this observation is in agreement with the hypothesis that in glandular trichomes, Rubisco  
248 recycles the CO<sub>2</sub> released by the specialized metabolism (Pottier et al. 2018).

249 These expression data may help choose appropriate trichome-specific promoters to drive  
250 the expression of a transgene for metabolic engineering purposes. Indeed, although  
251 *NtCYP71D16* and *NtCBTS2 $\alpha$*  reach higher expression level in trichomes at stage III of leaf  
252 development, *NtCPS2* and *NtMALD1* promoters should lead to a more homogenous  
253 expression of transgenes among leaves at different developmental stages. *NtLTPI* was an  
254 exception since its transcripts were identified in leaf and stem tissues devoid of trichomes.  
255 Although the *NtLTPI* promoter was claimed to confer trichome-specific expression,  
256 examination of the GUS reporter activity reported by Choi et al. (2012) revealed some  
257 activity in other cell types than trichomes and the expression in the stem was not displayed.  
258 Our observations are in line with previously published semi-quantitative RT-PCR which  
259 showed that *NtLTPI* is expressed in different organs (Harada et al. 2010).

260

### 261 A variety of expression patterns was detected for the different transcriptional reporters

262 Analysis of *GUS-VENUS* reporter lines revealed that, in most of them, the six promoters  
263 drove gene expression in the head cells of tall glandular trichomes of *N. tabacum*. However,  
264 expression was rarely exclusively observed in trichomes (Table 1). Moreover, for a given  
265 reporter construct, variability in expression patterns was observed between independent lines.  
266 Concerning *NtCYP71D16*, Wang et al (2002) noted that after overnight incubation (like in the  
267 present work) with the GUS substrate, faint GUS staining was found in guard cells and veins

268 in some areas of some leaves, and at the cut edges of some leaf blades. No data was reported  
269 for the GUS reporter driven by the *NtCBTS-2α* and *NtCPS2* promoters in other organs than  
270 leaves (Ennajdaoui et al. 2010; Sallaud et al. 2012). Based on RT-qPCR data, *NtCYP71D16*,  
271 *NtCBTS2α*, *NtCPS2*, *NtRbcS-T1*, and *NtMALD1* can, however, be considered as specifically  
272 expressed in trichomes. A possible reason for the partial discrepancy between RT-qPCR and  
273 gene reporter data is that the promoter regions that were used in the constructs are incomplete.  
274 This is unlikely to be the case for six promoters, especially for those that are close to 2 kb  
275 long (i.e. *pNtRbcS-T1*, *pNtMALD1*, and *pNtCYP71D16*), unless cis regulatory sequences are  
276 located downstream of the translation start. In addition, this hypothesis fails to explain the  
277 wide diversity in expression patterns observed between lines expressing the same construct. A  
278 more likely explanation is a position effect due to the random insertion of the T-DNA in the  
279 plant cell genome. Indeed, the genomic environment surrounding the integrated cassette  
280 (structure of chromatin, presence of enhancers/silencers near the insertion site) is known to  
281 alter the expression level and profile of transgenes (Kohli et al. 2010; Hernandez-Garcia and  
282 Finer 2014). Between independent lines, and thus different insertion sites, those position  
283 effects might differ according to the proximal endogenous regulatory elements.

284 Integration of insulators in the vector, at both ends of the transgene (as well as between  
285 different expression cassettes within the construct in case of a multigene construct) could be a  
286 way to prevent undesirable effects (Hasegawa and Nakatsuji 2002; Biłas et al. 2016). Indeed,  
287 insulators are sequences that stabilize gene expression by guaranteeing gene autonomy  
288 (Hasegawa and Nakatsuji 2002; Biłas et al. 2016). Another option could be to insert the  
289 transgenes in a specific locus, preferentially one promoting high expression of genes (Abdel-  
290 ghany et al. 2015). Genome editing technologies such as CRISPR-Cas9, which allows  
291 insertions in a desired locus through homologous end joining, could be a way to cope with  
292 such an issue (Cao et al. 2016; Khatodia et al. 2016). Finally, a reporter gene coding for a  
293 fluorescent protein such as GFP could be included in the genetic construct to facilitate the  
294 screening of transformed plants in order to select transgenic lines that only express the  
295 reporter in glandular trichomes. If the same promoter is used to drive the expression of both  
296 the fluorescent reporter and the transgene(s) of interest, the rationale is that the fluorescence  
297 pattern and intensity of the reporter mirror those of the transgene(s) of interest.

298 It would have been interesting to confirm, in the reporter lines, the quantitative variations  
299 of activity between the different promoters. However, because of the position effect,  
300 quantitative variations do not necessarily reflect the actual strengths of the promoters. The

301 positive consequence of this variation is that transgenic plants can be screened to find those  
302 that express the gene of interest at the appropriate level.

303

### 304 **Cloning strategy for implementation of an entire metabolic pathway in *Nicotiana*** 305 ***tabacum* glandular trichomes**

306 The use of *N. tabacum* glandular trichomes for metabolic engineering purposes is a very  
307 attractive strategy. However, heterologous expression of an entire metabolic pathway into  
308 such specific plant organ may be a tedious process that poses several technical challenges.  
309 This includes promoting cell type-specific expression at appropriate levels of multiple genes  
310 (coding for enzymes or transporters) that segregate together in the progeny.

311 For this purpose, the use of several independent T-DNA to generate plants expressing an  
312 entire metabolic pathway is questionable and an approach allowing delivery of multiple  
313 genetic constructs in a unique vector appears to be a far better option. In this way, a single  
314 DNA molecule is transferred into the plant cells, at the same locus, which limits the intergenic  
315 variation in expression due to positional effects in the genome. Such an approach also ensures  
316 that all genes cloned in this molecule are inherited together (Dafny-Yelin and Tzfira 2007).

317 However, generating a single T-DNA vector bearing several genes each placed under the  
318 same trichome-specific promoter can lead to a dilution effect since transcription might be  
319 limited by the amount of available transcription factors recruited by cis-elements present in  
320 this promoter (Biřas et al. 2016). To prevent such dilution effect, genes coding for each  
321 enzyme could be placed downstream different trichome-specific promoters. The use of  
322 different promoters will also prevent homologous recombination between similar promoters  
323 in the construct and loss of the sequence in-between.

324 In addition to that, the level of expression is obviously an essential trait. Beside avoiding  
325 dilution effects of trans elements, using different promoters may be needed to adapt the level  
326 of expression to the efficiency of the enzyme encoded by the transgene. This explains why  
327 identifying different trichome-specific gene promoters is so important. By identifying and  
328 comparing different trichome-specific promoters such as *pNtCYP71D16*, *pNtCBTS2 $\alpha$* ,  
329 *pNtCPS2*, *pNtRbs-T1*, and *pNtMALD1*, our work provides the community with a useful  
330 toolkit to express a gene in glandular trichomes at different levels.

331 In conclusion, a key and unique feature of glandular trichomes is their ability to synthesize  
332 and secrete large amounts of a limited panel of specialized metabolites. Taking advantage of  
333 the pool of natural precursors to produce specific metabolites in glandular trichomes by  
334 metabolic engineering would therefore be of high biotechnological interest. This requires the

335 availability of transcriptional promoters specifically active in these structures that could be  
336 used to efficiently drive the expression of the transgenes coding for the enzymes needed to  
337 implement the pathway in a cell-type specific way. In this respect, the identification of the  
338 *NtMALDI* and *NtRbS-T1* promoters and their comparison with previously identified trichome-  
339 specific promoters are promising tools for expressing entire biosynthesis pathways in  
340 glandular trichomes of *N. tabacum*. However, use of trichome-specific promoters should  
341 ideally be associated with the addition of insulators at the end of each expression cassette as  
342 well as with site-directed genome edition technologies to ensure cell-type specific expression  
343 at an appropriate level. In the long term, detailed knowledge of the gene network existing in  
344 plant glandular trichomes will generate new leads to tap the largely unexploited potential of  
345 these specialized plant organs to increase plant resistance to pests, or to lead to improved  
346 production of important specialized metabolites via finely tuned metabolic engineering  
347 approaches.  
348

## 349 **Material and methods**

350

### 351 **Plant material and plant growth conditions**

352 *Nicotiana tabacum* cv Petit Havana SR1 (Maliga *et al.* 1973) plants were used in this  
353 work. For the *in vitro* cultures, seeds were sterilized by immersion in 1 ml 70% (v/v) ethanol  
354 for 1 min and then in 1 ml 50% (v/v) commercial bleach for 2 min. Seeds were then washed  
355 three times with 1 ml of sterile MilliQ water and kept at 4°C, in the dark, during 48 h for  
356 stratification. Sterilized seeds were sown on solid Murashige and Skoog (MS) medium [4.33  
357 g.l<sup>-1</sup> MS salts (MP Biochemicals, Solon, OH, USA; [www.mpbio.com](http://www.mpbio.com)), 3% (w/v) sucrose, 1%  
358 (w/v) agar, pH 5.8 (KOH)] and placed in the growth chamber at 25°C under a 16 h  
359 photoperiod (50 μmol photon m<sup>-2</sup> sec<sup>-1</sup>). For the soil cultures, seeds were stratified before  
360 being sown in potting soil (DCM, Grobendonk, Belgium; [dcm-info.com](http://dcm-info.com)). Isolated plantlets  
361 coming from potting soil or *in vitro* conditions were transferred to Jiffy pots (Gronud,  
362 Norway; [www.jiffypot.com](http://www.jiffypot.com)) before being transferred to bigger pots containing potting soil  
363 (DCM). Plants on soil were grown under controlled conditions, in a phytotron set at 25°C and  
364 with a 16 h photoperiod (300 μmol photon m<sup>-2</sup> sec<sup>-1</sup>).

365

### 366 **Tissue isolation, RNA extraction and cDNA synthesis**

367 Trichomes were removed from tissues of 6-week-old plants following the cold-brushing  
368 method (Wang *et al.* 2001). For the analysis of gene expression in trichomes during leaf  
369 development, trichomes were isolated from leaves at different developmental stages defined  
370 here by leaf length: < 2.5 cm (stage I), between 2.5 cm and 6.5 cm (stage II), between 6.5 cm  
371 and 15 cm (stage III), and > 15 cm (stage IV). For the analysis of gene expression in different  
372 tissues, we harvested roots, trichomes-free stems, trichomes-free leaves, and leaf trichomes  
373 (pool of leaves from stage I to stage III) from 6-week-old plants, and flowers from 10-week-  
374 old plants. For each biological replicate (except for isolated trichomes), 100 mg of material  
375 was pre-ground in liquid nitrogen using a mortar and pestle. Pre-ground tissues and isolated  
376 trichomes were ground in 2 mL Precellys tubes containing 200 μL of ceramic beads Zirmil  
377 (0.5 mm, Saint Gobain Zipro, Le Pontet, France) and 500 μL of lysis/2-Mercaptoethanol  
378 solution of the Spectrum<sup>TM</sup> Plant Total RNA Kit (Sigma-Aldrich, St. Louis, Missouri, USA;  
379 <http://www.sigmaaldrich.com>). Samples were subjected to four consecutive 30 s grinding  
380 periods at 6,000 rpm using a Precellys 24 (Bertin Technologies, Montigny-le-Bretonneux,  
381 France). The homogenates were centrifuged at 1,000 g for 3 min (Eppendorf 5430, Hamburg,

382 Germany). The subsequent steps of the RNA extraction were performed on the supernatants  
383 according to the manufacturer's specifications, except that the 56 °C incubation step was  
384 omitted. RNA was eluted in 50 µl elution buffer and quantified using a spectrophotometer  
385 (Nanodrop® ND-1000, Isogen Life Science, The Netherlands; [www.isogen-lifescience.com](http://www.isogen-lifescience.com)).  
386 Genomic DNA contamination was eliminated by using the On-Column DNase I Digestion Set  
387 (Sigma-Aldrich, St. Louis, Missouri, USA; [www.sigmaaldrich.com](http://www.sigmaaldrich.com)). The RNA was finally  
388 flash frozen in liquid nitrogen and stored at -80°C. DNA-free RNA (500 µg) was used for  
389 reverse transcription using the Moloney Murine Leukemia Virus Reverse transcriptase  
390 (Promega, Madison, Wisconsin, USA; [be.promega.com](http://be.promega.com)) and oligo(dT)<sub>18</sub>. Reverse  
391 transcription mixture was added according to the manufacturer's specifications. After adding  
392 the transcriptase, samples were incubated for 5 min at 25°C, followed by 1 h at 42°C and 5  
393 min at 85°C, placed on ice for 5 min, aliquoted, and stored at -20°C.

394

### 395 **Gene expression**

396 Gene-specific RT-qPCR primers listed in Table S1 were designed at the 3' end of the  
397 coding sequence, (size, about 100 bp; melting temperature, 60°C) using OligoPerfect™  
398 Designer ([www.thermofisher.com](http://www.thermofisher.com)). cDNA (5 µl, 17 fold diluted) was used as a template in 20  
399 µl RT-qPCR reaction, which also contained 10 µl of qPCR master mix plus for SYBR Green I  
400 (Eurogentec, Seraing, Belgium, <https://secure.eurogentec.com/eu-home.html> ) and 5 µl of  
401 primer mix (1.3 µM each). Amplification was performed on an ABI 7500 Real-Time PCR  
402 system (Waltham, Massachusetts, USA; <http://www.thermofisher.com>). Primer specificity  
403 was confirmed by analysis of the melting curves. For each tissue, primer amplification  
404 efficiency ( $\geq 95\%$ ) was determined using five standards from serial dilutions of a cDNA pool  
405 of the biological replicates used for gene expression analysis. Relative transcript levels were  
406 calculated following the  $2^{-\Delta\Delta Ct}$  method (Livak and Schmittgen 2001) with the geometric mean  
407 of mitochondrial ATP-synthase  $\beta$ -subunit (*ATP2*) and ubiquitin (*UBQ*) used as references for  
408 comparison between different tissues, and of *ATP2*, *UBQ*, and actin (*ACTIN*), for comparison  
409 between different leaf developmental stages. For absolute quantification, PCR products  
410 amplified by gene-specific RT-qPCR primers listed in Supplemental Table S1 were cloned in  
411 pGEM-T Easy vector (Promega, Madison, Wisconsin, USA) prior to their sequencing.  
412 Constructs were linearized by PstI restriction, purified using Nucleospin Extract II kit  
413 (Macherey-Nagel, Düren, Germany) and rigorously quantified using a spectrophotometer  
414 (Nanodrop® ND-1000, Isogen Life Science, The Netherlands; [www.isogen-lifescience.com](http://www.isogen-lifescience.com)).  
415 For each quantified purified linear plasmid, the copy number was determined according to the

416 following equation: copy number = (vector amount [g])  $\times$   $6.023 \times 10^{23}$  [molecules/mole] /  
417 (660 [g/mole/base]  $\times$  size of the vector+insert [bases]). Absolute transcript levels were  
418 determined through the absolute standard curve method. Thus, for each studied gene,  
419 standards ( $2.10^6$ ,  $2.10^5$ ,  $2.10^4$ ,  $2.10^3$  copies) obtained by serial dilution of the purified linear  
420 plasmids were included in duplicate in q-PCR plates used to study gene expression during  
421 trichome development.

422

### 423 **Generation of plants expressing promoter-*GUSVENUS* Fusions**

424 The transcription promoter regions of *NtRbcS-T1* (1993 pb; GenBank accession:  
425 MG493459.1) and *NtMALDI* (1974 pb; GenBank accession: MG493458.1) were identified  
426 blasting the EST corresponding to *NtRbcS-T1* (GenBank accession: DV157962) and  
427 *NtMALDI* (GenBank accession: FS387666) coding sequences to the genome of *N.*  
428 *tabacum* TN90 in the Solgenomics database (<http://solgenomics.net>). The promoter regions of  
429 *NsCBTS2 $\alpha$*  (985 bp; GenBank accession: HM241151.1), *NtLTP1* (849 bp; GenBank  
430 accession: AB625593.1), *NtCYP71D16* (1852 pb; GenBank accession: AF166332.1), and  
431 *NtCPS2* (1448 bp; GenBank accession: HE588139.1) were defined as previously (Wang et al.  
432 2002; Ennajdaoui et al. 2010; Choi et al. 2012; Sallaud et al. 2012). Promoter regions were  
433 amplified by PCR using as a template genomic DNA prepared from *N. tabacum* or *N.*  
434 *sylvestris* leaves and the primers listed in Supplemental Table S2. The amplified fragments  
435 were inserted in the pGEM<sup>®</sup>-T Easy Vector (Promega, Madison, Wisconsin, USA;  
436 [www.promega.com](http://www.promega.com)) and sequenced. Cloned fragments were cleaved using HindIII (or NotI  
437 for *pNtMALDI* and *pNtRbcS-T1*) and KpnI, prior to their insertion in a pAUX3131 construct  
438 (Navarre *et al.* 2011), upstream of the *GUSVENUS* coding sequence. The fusion construct  
439 was excised using I-SceI and inserted into the pPZP-RCS2-nptII plant expression vector  
440 (Goderis *et al.* 2002), also cut with I-SceI. The construct was introduced into *Agrobacterium*  
441 *tumefaciens* LBA4404 virGN54D (van der Fits *et al.* 2000) for subsequent *N. tabacum* leaf  
442 disc transformation (Horsch *et al.* 1986). The regenerated plants were finally transferred to  
443 soil to be analyzed by GUS staining.

444

### 445 **GUS histochemical analysis**

446 Histochemical staining of plant tissues for GUS activity was conducted as described  
447 previously (Bienert *et al.* 2012). To determine the tissue expression frequencies among  
448 independent lines transformed with the same construct (Table 1), GUS staining was  
449 performed for 16h on 6-week-old T0 plants growing in soil. Results were then confirmed in



450 the corresponding T1 plants of the same age except for flowers tissues, which were analyzed  
451 on 10-week-old plants (Fig. 5 and Fig. 6). Stained tissues were washed with 70% ethanol for  
452 chlorophyll extraction, transferred to 50% glycerol, observed under a light binocular (Carl  
453 Zeiss MicroImaging) and photographed (Moticam 2300).

454

#### 455 **Statistical analysis**

456 All tests were performed using the R software. For q-PCR, data were analyzed using  
457 *kruskal.test* (Kruskal–Wallis) function for multiple comparisons. For multiple comparisons,  
458 *npaircomp* package was used to perform Tukey post-hoc test when significant differences  
459 were detected ( $P < 0.05$ ). Different letters indicate significant differences between samples.

460

#### 461 **Supplementary data**

462 **Supplemental Fig. 1** Expression of *NtATP2* and *NtUBQ* control genes used to normalize the  
463 data in Figure 1.

464 **Supplemental Fig. 2** Expression of *NtEF1 $\alpha$*  in trichomes according to leaf developmental  
465 stage.

466 **Supplemental Table S1** List of primers used for RT-qPCR.

467 **Supplemental Table S2** List of primers used to amplify the promoter sequences.

468

## 469 **References**

- 470 Abdel-ghany SE, Golovkin M, Reddy ASN (2015) Engineering of Plants for the Production  
471 of Commercially Important Products: Approaches and Accomplishments. In: Bahadur B  
472 (ed) Plant Biology and Biotechnology. Springer India, New Delhi, pp 551–577
- 473 Bienert MD, Delannoy M, Navarre C, Boutry M (2012) NtSCP1 from Tobacco Is an  
474 Extracellular Serine Carboxypeptidase III That Has an Impact on Cell Elongation. *Plant*  
475 *Physiol* 158:1220–1229 . doi: 10.1104/pp.111.192088
- 476 Biłas R, Szafran K, Hnatuszko-Konka K, Kononowicz AK (2016) Cis-regulatory elements  
477 used to control gene expression in plants. *Plant Cell. Tissue Organ Cult.* 127:269–287
- 478 Bouvier F, Rahier A, Camara B (2005) Biogenesis, molecular regulation and function of plant  
479 isoprenoids. *Prog Lipid Res* 44:357–429 . doi: 10.1016/j.plipres.2005.09.003
- 480 Cao HX, Wang W, Le HTT, Vu GTH (2016) The power of CRISPR-Cas9-induced genome  
481 editing to speed up plant breeding. *Int J Genomics*. doi: 10.1155/2016/5078796
- 482 Choi YE, Lim S, Kim H-J, Han JY, Lee M-H, Yang Y, Kim J-A, Kim Y-S (2012) Tobacco  
483 NtLTP1, a glandular-specific lipid transfer protein, is required for lipid secretion from  
484 glandular trichomes. *Plant J* 70:480–91 . doi: 10.1111/j.1365-313X.2011.04886.x
- 485 Croteau R, Kutchan TM, Lewis NG (2000) Natural Products (Secondary Metabolites). In:  
486 Buchanan B, Gruissem W, Jones R (eds) *Biochemistry & Molecular Biology of Plants*.  
487 American Society of Plant Physiologists, pp 1250–1318
- 488 Dafny-Yelin M, Tzfira T (2007) Delivery of Multiple Transgenes to Plant Cells. *Plant Physiol*  
489 145:1118–1128 . doi: 10.1104/pp.107.106104
- 490 Ennajdaoui H, Vachon G, Giacalone C, Besse I, Sallaud C, Herzog M, Tissier A (2010)  
491 Trichome specific expression of the tobacco (*Nicotiana sylvestris*) cembratrien-ol  
492 synthase genes is controlled by both activating and repressing cis-regions. *Plant Mol*  
493 *Biol* 73:673–85 . doi: 10.1007/s11103-010-9648-x
- 494 Gershenzon J, Dudareva N (2007) The function of terpene natural products in the natural  
495 world. *Nat Chem Biol* 3:408–414 . doi: 10.1038/nchembio.2007.5
- 496 Goderis IJWM, De Bolle MFC, François IEJA, Wouters PFJ, Broekaert WF, Cammue BPA  
497 (2002) A set of modular plant transformation vectors allowing flexible insertion of up to  
498 six expression units. *Plant Mol Biol* 50:17–27 . doi: 10.1023/A:1016052416053
- 499 Gwak YS, Han JY, Adhikari PB, Ahn CH, Choi YE (2017) Heterologous production of a  
500 ginsenoside saponin (compound K) and its precursors in transgenic tobacco impairs the  
501 vegetative and reproductive growth. *Planta* 245:1105–1119 . doi: 10.1007/s00425-017-

- 502 2668-x
- 503 Harada E, Kim J-AA, Meyer AJ, Hell R, Clemens S, Choi Y-EE (2010) Expression profiling  
504 of tobacco leaf trichomes identifies genes for biotic and abiotic stresses. *Plant Cell*  
505 *Physiol* 51:1627–1637 . doi: 10.1093/pcp/pcq118
- 506 Hasegawa K, Nakatsuji N (2002) Insulators prevent transcriptional interference between two  
507 promoters in a double gene construct for transgenesis. *FEBS Lett* 520:47–52 . doi:  
508 10.1016/S0014-5793(02)02761-8
- 509 Hernandez-Garcia CM, Finer JJ (2014) Identification and validation of promoters and cis-  
510 acting regulatory elements. *Plant Sci* 217–218:109–119 . doi:  
511 10.1016/j.plantsci.2013.12.007
- 512 Horsch RB, Klee HJ, Stachel S, Winans SC, Nester EW, Rogers SG, Fraley RT (1986)  
513 Analysis of *Agrobacterium tumefaciens* virulence mutants in leaf discs. *Proc Natl Acad*  
514 *Sci U S A* 83:2571–2575 . doi: 10.1073/pnas.83.8.2571
- 515 Huchelmann A, Boutry M, Hachez C (2017) Plant glandular trichomes: natural cell factories  
516 of high biotechnological interest. *Plant Physiol* 175:6–22 . doi: 10.1104/pp.17.00727
- 517 Kempinski C, Jiang Z, Bell S, Chappell J (2015) Metabolic engineering of higher plants and  
518 algae for isoprenoid production. In: Schrader J, Bohlmann J (eds) *Biotechnology of*  
519 *Isoprenoids*. Springer International Publishing, Cham, pp 161–199
- 520 Khatodia S, Bhatotia K, Passricha N, Khurana SMP, Tuteja N (2016) The CRISPR/Cas  
521 Genome-Editing Tool: Application in Improvement of Crops. *Front Plant Sci* 7:1–13 .  
522 doi: 10.3389/fpls.2016.00506
- 523 Kirby J, Keasling JD (2009) Biosynthesis of Plant Isoprenoids: Perspectives for Microbial  
524 Engineering. *Annu Rev Plant Biol* 60:335–55 . doi:  
525 10.1146/annurev.arplant.043008.091955
- 526 Kohli A, Miro B, Twyman RM (2010) Chapter 7 Transgene Integration, Expression and  
527 Stability in Plants: Strategies for Improvements. In: C. Kole et al. (ed) *Transgenic Crop*  
528 *Plants*. Springer-Verlag, Berlin, Heidelberg, pp 201–237
- 529 Lacerda ALM, Fonseca LN, Blawid R, Boiteux LS, Ribeiro SG, Brasileiro ACM (2015)  
530 Reference gene selection for qPCR analysis in tomato-bipartite begomovirus interaction  
531 and validation in additional tomato-virus pathosystems. *PLoS One* 10:1–17 . doi:  
532 10.1371/journal.pone.0136820
- 533 Lange BM, Ahkami A, Markus Lange B, Ahkami A (2013) Metabolic engineering of plant  
534 monoterpenes, sesquiterpenes and diterpenes-current status and future opportunities.  
535 *Plant Biotechnol J* 11:169–96 . doi: 10.1111/pbi.12022

- 536 Laterre R, Pottier M, Remacle C, Boutry M (2017) Photosynthetic Trichomes Contain a  
537 Specific Rubisco with a Modified pH-Dependent Activity. *Plant Physiol* 173:2110–2120  
538 . doi: 10.1104/pp.17.00062
- 539 Livak KJ, Schmittgen TD (2001) Analysis of relative gene expression data using real-time  
540 quantitative PCR and the 2- $\Delta\Delta$ CT method. *Methods* 25:402–408 . doi:  
541 10.1006/meth.2001.1262
- 542 Lu Y, Xie L, Chen J (2012) A novel procedure for absolute real-time quantification of gene  
543 expression patterns. *Plant Methods* 8:1–11 . doi: 10.1186/1746-4811-8-9
- 544 Maliga P, Sz-Breznovits A, Márton L (1973) Streptomycin-resistant plants from callus culture  
545 of haploid tobacco. *Nat New Biol* 244:29–30
- 546 Marienhagen J, Bott M (2013) Metabolic engineering of microorganisms for the synthesis of  
547 plant natural products. *J Biotechnol* 163:166–178 . doi: 10.1016/j.jbiotec.2012.06.001
- 548 Moses T, Pollier J (2013) Bioengineering of plant (tri) terpenoids: from metabolic  
549 engineering of plants to synthetic biology in vivo and in vitro. *New Phytol* 200:27–43 .  
550 doi: 10.1111/nph.12325
- 551 Navarre C, Sallets A, Gauthy E, Maîtrejean M, Magy B, Nader J, Pety de Thozée C, Crouzet  
552 J, Batoko H, Boutry M (2011) Isolation of heat shock-induced *Nicotiana tabacum*  
553 transcription promoters and their potential as a tool for plant research and biotechnology.  
554 *Transgenic Res* 20:799–810 . doi: 10.1007/s11248-010-9459-5
- 555 Pandey A, Misra P, Bhambhani S, Bhatia C, Trivedi PK (2014) Expression of arabidopsis  
556 myb transcription factor, *atmyb111*, in tobacco requires light to modulate flavonol  
557 content. *Sci Rep* 4:5018 . doi: 10.1038/srep05018
- 558 Pottier M, Gilis D, Boutry M (2018) The Hidden Face of Rubisco. *Trends Plant Sci* 23:382–  
559 392 . doi: 10.1016/j.tplants.2018.02.006
- 560 Sallaud C, Giacalone C, Töpfer R, Goepfert S, Bakaher N, Rösti S, Tissier A (2012)  
561 Characterization of two genes for the biosynthesis of the labdane diterpene Z-abienol in  
562 tobacco (*Nicotiana tabacum*) glandular trichomes. *Plant J* 72:1–17 . doi: 10.1111/j.1365-  
563 313X.2012.05068.x
- 564 Saxena B, Subramaniyan M, Malhotra K, Bhavesh NS, Potlakayala SD, Kumar S (2014)  
565 Metabolic engineering of chloroplasts for artemisinic acid biosynthesis and impact on  
566 plant growth. *J Biosci* 39:33–41 . doi: 10.1007/s12038-013-9402-z
- 567 Schillmiller AL, Last RL, Pichersky E (2008) Harnessing plant trichome biochemistry for the  
568 production of useful compounds. *Plant J* 54:702–11 . doi: 10.1111/j.1365-  
569 313X.2008.03432.x

- 570 Van Agtmael MA, Eggelte TA, Van Boxtel CJ (1999) Artemisinin drugs in the treatment of  
571 malaria: From medicinal herb to registered medication. *Trends Pharmacol Sci* 20:199–  
572 205 . doi: 10.1016/S0165-6147(99)01302-4
- 573 van der Fits L, Deakin E, Hoge J, Memelink J (2000) The ternary transformation system:  
574 constitutive virG on a compatible plasmid dramatically increases *Agrobacterium*-  
575 mediated plant transformation. *Plant Mol Biol* 43:495–502
- 576 van Herpen TWJM, Cankar K, Nogueira M, Bosch D, Bouwmeester HJ, Beekwilder J (2010)  
577 *Nicotiana benthamiana* as a production platform for artemisinin precursors. *PLoS One*  
578 5:e14222 . doi: 10.1371/journal.pone.0014222
- 579 Wagner GJ, Wang E, Shepherd RW (2004) New approaches for studying and exploiting an  
580 old protuberance, the plant trichome. *Ann Bot* 93:3–11 . doi: 10.1093/aob/mch011
- 581 Wang B, Kashkooli AB, Sallets A, Ting H-MMH-M, de Ruijter NCAA, Olofsson L,  
582 Brodelius P, Pottier M, Boutry M, Bouwmeester H, van der Krol AR (2016) Transient  
583 production of artemisinin in *Nicotiana benthamiana* is boosted by a specific lipid transfer  
584 protein from *A. annua*. *Metab Eng* 38:159–169 . doi: 10.1016/j.ymben.2016.07.004
- 585 Wang E, Gan S, Wagner GJ (2002) Isolation and characterization of the CYP71D16  
586 trichome-specific promoter from *Nicotiana tabacum* L. *J Exp Bot* 53:1891–1897 . doi:  
587 10.1093/jxb/erf054
- 588 Wang E, Wang R, DeParasis J, Loughrin JH, Gan S, Wagner GJ (2001) Suppression of a  
589 P450 hydroxylase gene in plant trichome glands enhances natural-product-based aphid  
590 resistance. *Nat Biotechnol* 19:371–374 . doi: 10.1038/86770
- 591 Yoon JM, Zhao L, Shanks J V (2013) Metabolic Engineering with Plants for a Sustainable  
592 Biobased Economy. *Annu Rev Chem Biomol Eng* 4:211–37 . doi: 10.1146/annurev-  
593 chembioeng-061312-103320
- 594
- 595

596 **Table 1** Frequency of GUS activity in different organs of transgenic *N. tabacum* lines  
597 showing expression in tall glandular trichomes<sup>a</sup>.  
598

| PROMOTERS          | SGT <sup>b</sup> | LEAVES | ROOTS | STEMS | ONLY IN TGT |
|--------------------|------------------|--------|-------|-------|-------------|
| <i>pNtRbcS-T1</i>  | 11/20            | 18/20  | 10/20 | 16/20 | 2/20        |
| <i>pNtMALD1</i>    | 10/26            | 20/26  | 21/26 | 22/26 | 1/26        |
| <i>pNsCBTS2α</i>   | 7/44             | 29/44  | 27/44 | 41/44 | 2/44        |
| <i>pNtCYP71D16</i> | 12/32            | 21/32  | 15/32 | 25/32 | 3/32        |
| <i>pNtCPS2</i>     | 21/26            | 17/26  | 16/26 | 24/26 | 1/26        |
| <i>pNtLTP1</i>     | 18/23            | 23/23  | 22/23 | 23/23 | 0/23        |

599  
600 <sup>a</sup> The GUS expression frequency was determined as indicated in the Material and methods  
601 among independent lines of transgenics plants expressing the *GUS-VENUS* reporter under the  
602 control of the indicated promoters.

603 <sup>b</sup> GUS activity was observed in tall glandular trichomes (TGT), short glandular trichomes  
604 (SGT), leaves (besides trichomes), roots, and stems (besides trichomes) of 6-week-old T0  
605 plants.

606

## 607 **Figure legends**

608 **Fig. 1** Transcript levels in different organs of *N. tabacum*. Normalized transcript levels were  
609 determined as indicated in the Material and methods on the indicated organs. Results are  
610 shown as mean ± SD of three to five repeats. Different letters indicate significant differences  
611 according to a Kruskal-Wallis test ( $p < 0.05$ ) followed by a Tukey post hoc test.

612 **Fig. 2** Transcript levels in trichomes isolated from *N. tabacum* leaves at different  
613 developmental stages. Normalized transcript levels were determined as indicated in the  
614 Material and methods. St: leaf developmental stage. Stage 1: leaf length < 2.5 cm; stage II:  
615 leaf length between 2.5 cm and 6.5 cm; stage III: leaf length between 6.5 cm and 15 cm; stage  
616 IV: leaf length > 15 cm. Results are shown as mean ± SD of three repeats. Different letters  
617 indicate significant differences according to a Kruskal-Wallis test ( $p < 0.05$ ) followed by a  
618 Tukey post hoc test.

619

620 **Fig. 3** Absolute transcript levels at stage III of leaf development in *N. tabacum*. Absolute  
621 transcript levels were determined as indicated in the Material and methods. Results are shown  
622 as mean ± SD of three repeats. Different letters indicate significant differences according to a  
623 Kruskal-Wallis test ( $p < 0.05$ ) followed by a Tukey post hoc test.

624

625 **Fig. 4** Molecular constructs used to generate transgenic *N. tabacum* expressing the  
626 *GUSVENUS* reporter gene under the control of trichome-specific promoters. The transcription  
627 promoter regions of *NtRbcS-T1* (MG493459.1), *NtMALD1* (MG493458.1), *NsCBTS2 $\alpha$*   
628 (HM241151.1), *NtLTP1* (AB625593.1), *NtCYP71D16* (AF166332.1), and *NtCPS2*  
629 (HE588139.1) were amplified and cloned as described in the Material and methods.

630

631 **Fig. 5** Specific GUS activity in trichomes of *N. tabacum*. GUS staining was performed in 6-  
632 week-old T1 lines.

633

634 **Fig. 6** Diversity of GUS activity of different transgenic *N. tabacum* lines in leaf (A), stem (B),  
635 and root (C) tissues. GUS staining was performed in 6-week-old T1 lines.

636



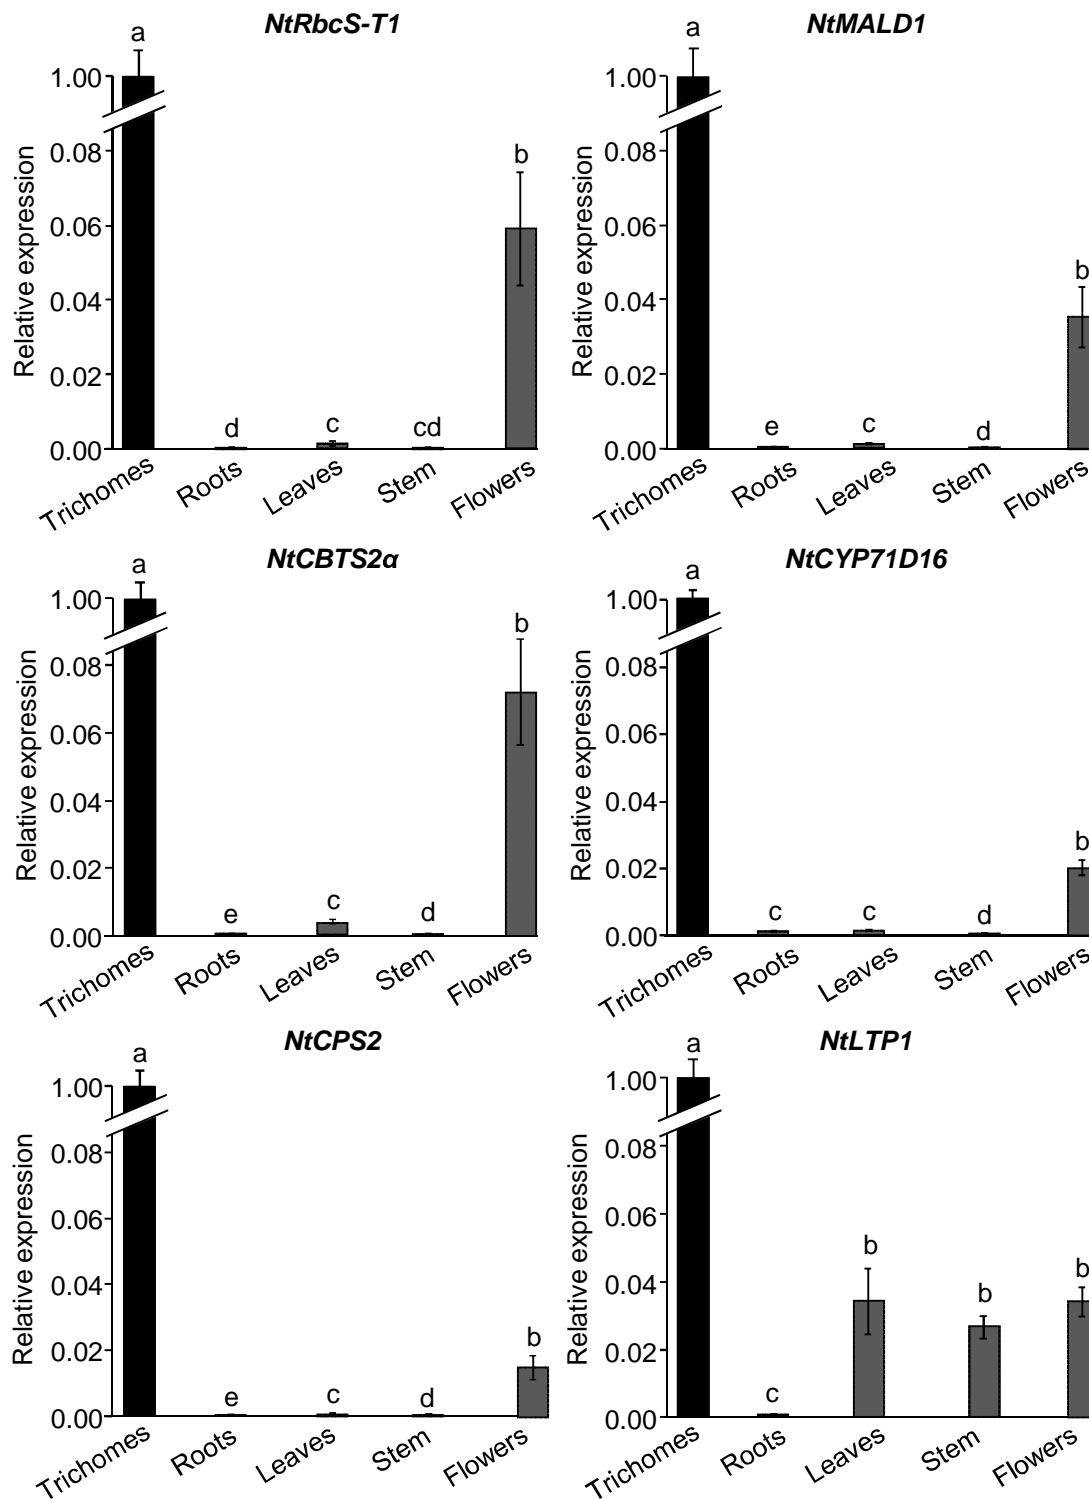

**Fig. 1** Transcript levels in different organs of *N. tabacum*. Normalized transcript levels were determined as indicated in the Material and methods on the indicated organs. Expression was measured as described in the Material and methods. Results are shown as mean  $\pm$  SD of three to five repeats. Different letters indicate significant differences according to a Kruskal-Wallis test (p < 0.05) followed by a Tukey post hoc test.

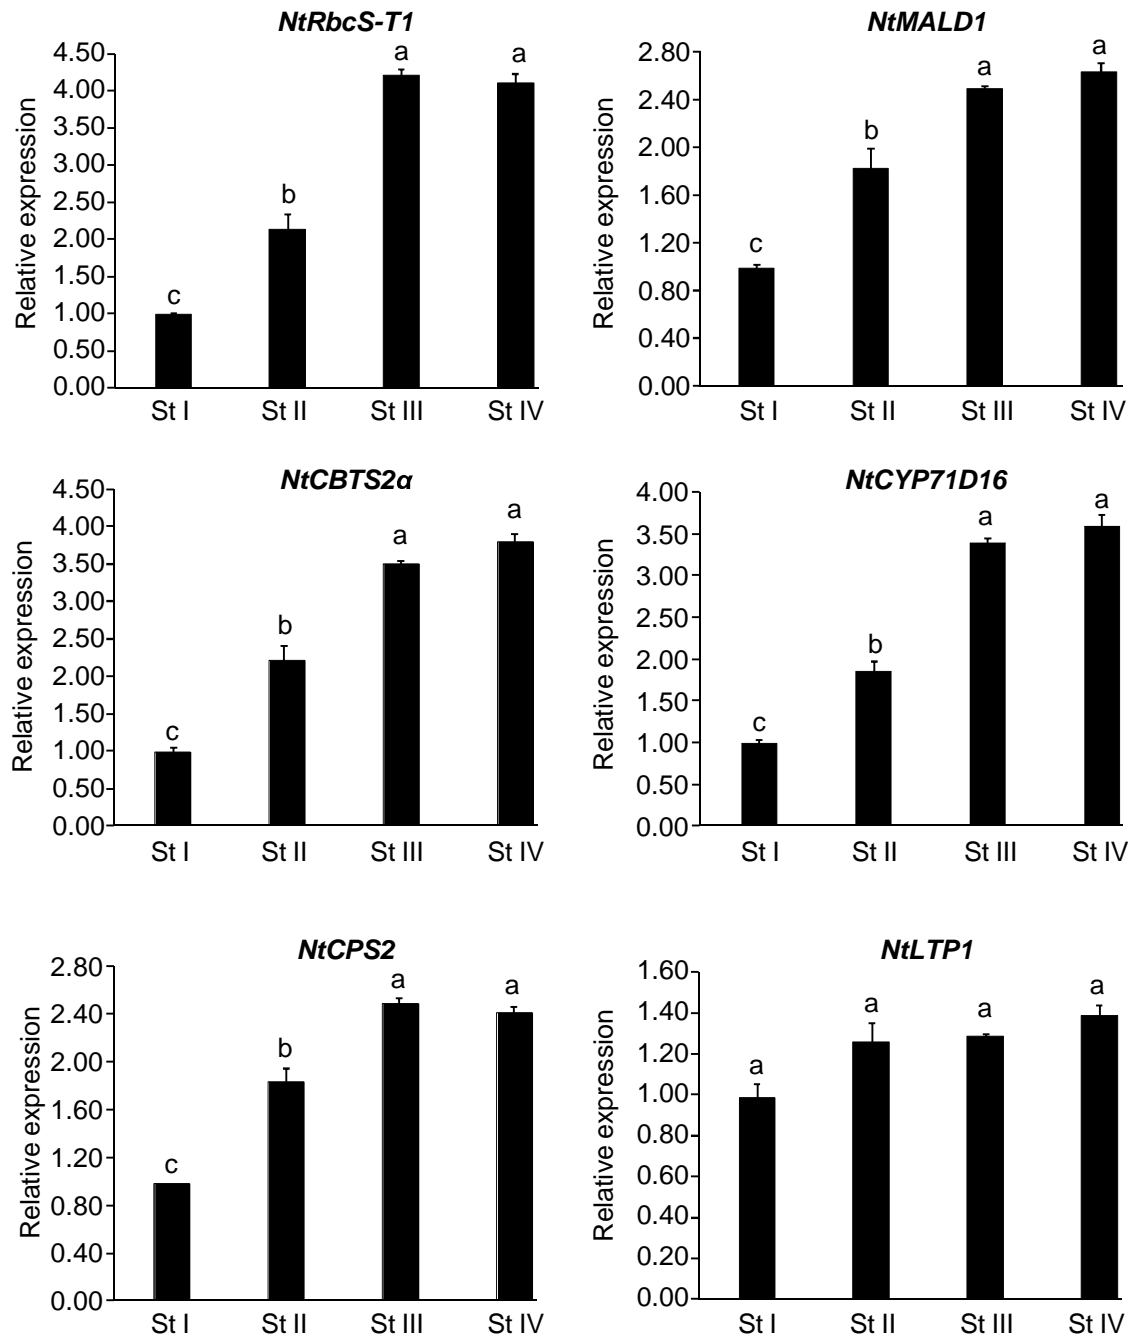

**Fig. 2** Transcript levels in trichomes isolated from *N. tabacum* leaves at different developmental stages. Normalized transcript levels were determined as indicated in the Material and methods. St: leaf developmental stage. Stage 1: leaf length < 2.5 cm; stage II: leaf length between 2.5 cm and 6.5 cm; stage III: leaf length between 6.5 cm and 15 cm; stage IV: leaf length > 15 cm. Results are shown as mean  $\pm$  SD of three repeats. Different letters indicate significant differences according to a Kruskal-Wallis test ( $p < 0.05$ ) followed by a Tukey post hoc test.

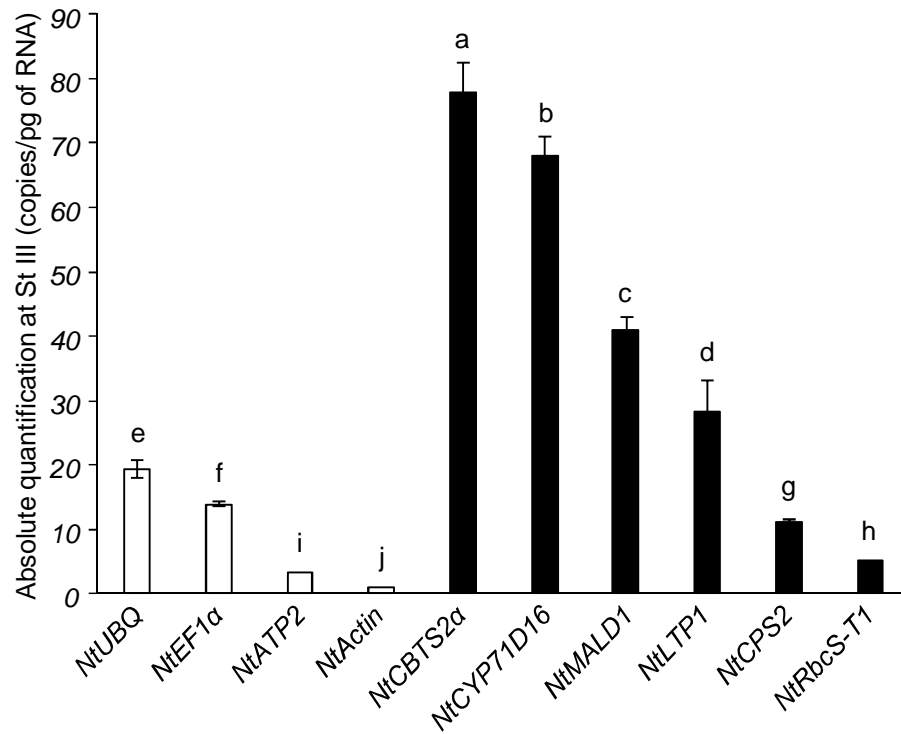

**Fig. 3** Absolute transcript levels at stage III of leaf development in *N. tabacum*. Absolute transcript levels were determined as indicated in the Material and methods. Results are shown as mean  $\pm$  SD of three repeats. Different letters indicate significant differences according to a Kruskal-Wallis test ( $p < 0.05$ ) followed by a Tukey post hoc test.

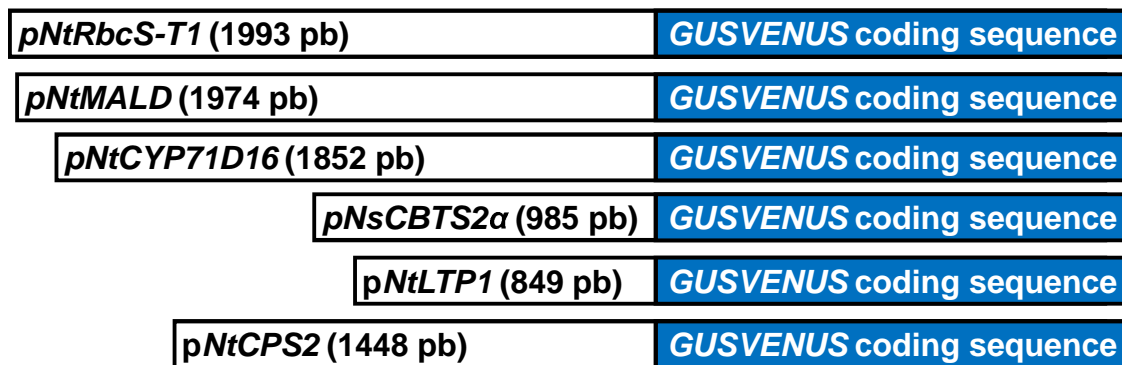

**Fig. 4** Molecular constructs used to generate transgenic *N. tabacum* expressing the *GUSVENUS* reporter gene under the control of trichome-specific promoters. The transcription promoter regions of *NtRbcS-T1* (MG493459.1), *NtMALD1* (MG493458.1), *NsCBTS2 $\alpha$*  (HM241151.1), *NtLTP1* (AB625593.1), *NtCYP71D16* (AF166332.1), and *NtCPS2* (HE588139.1) were amplified and cloned as described in the Material and methods.

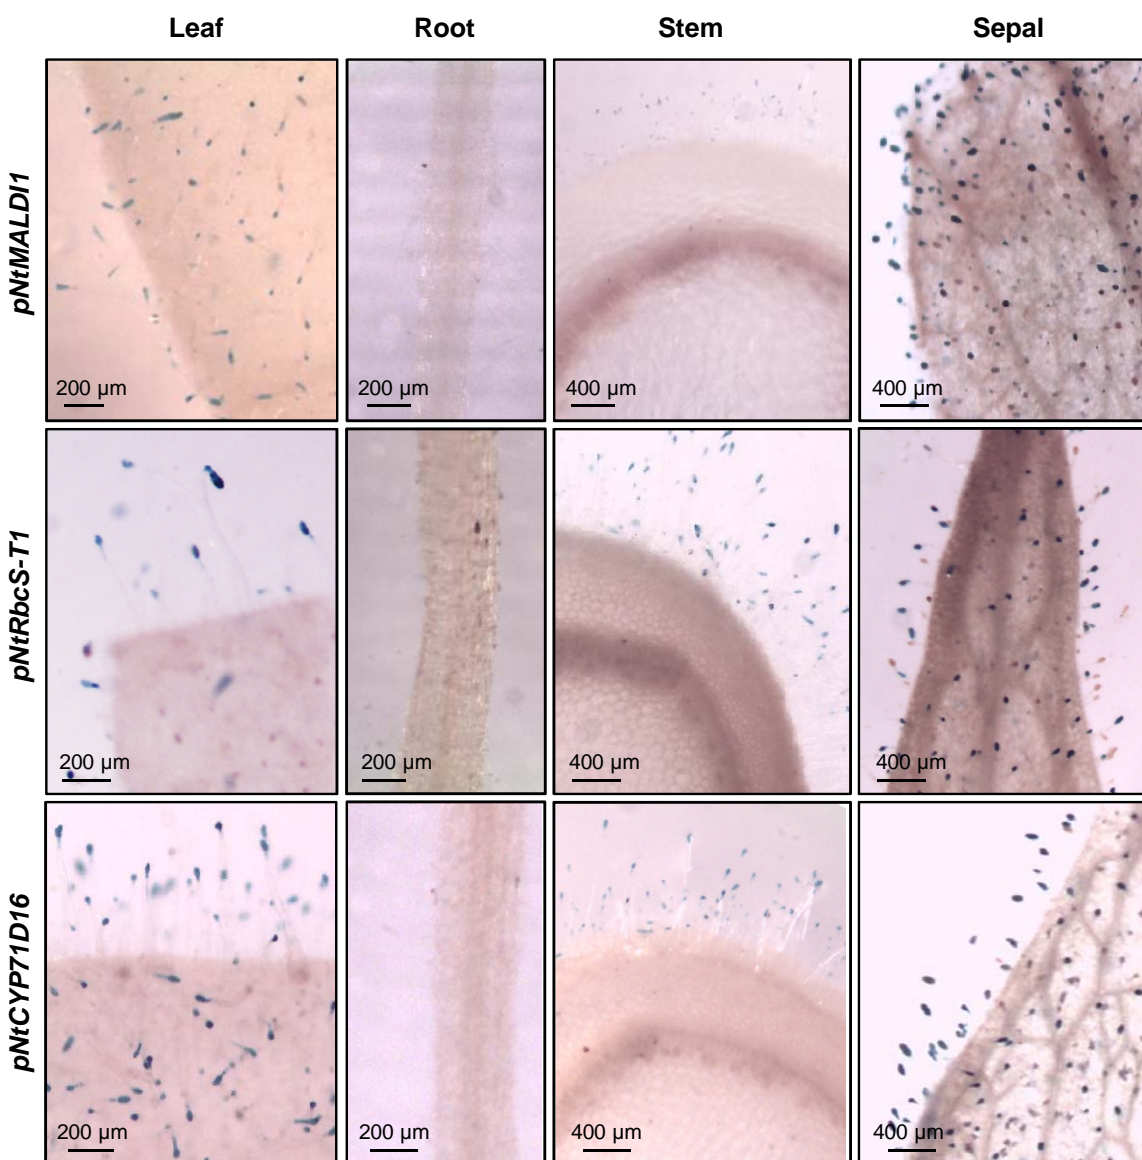

**Fig. 5** Specific GUS activity in trichomes of *N. tabacum*. GUS staining was performed in 6-week-old T1 lines.

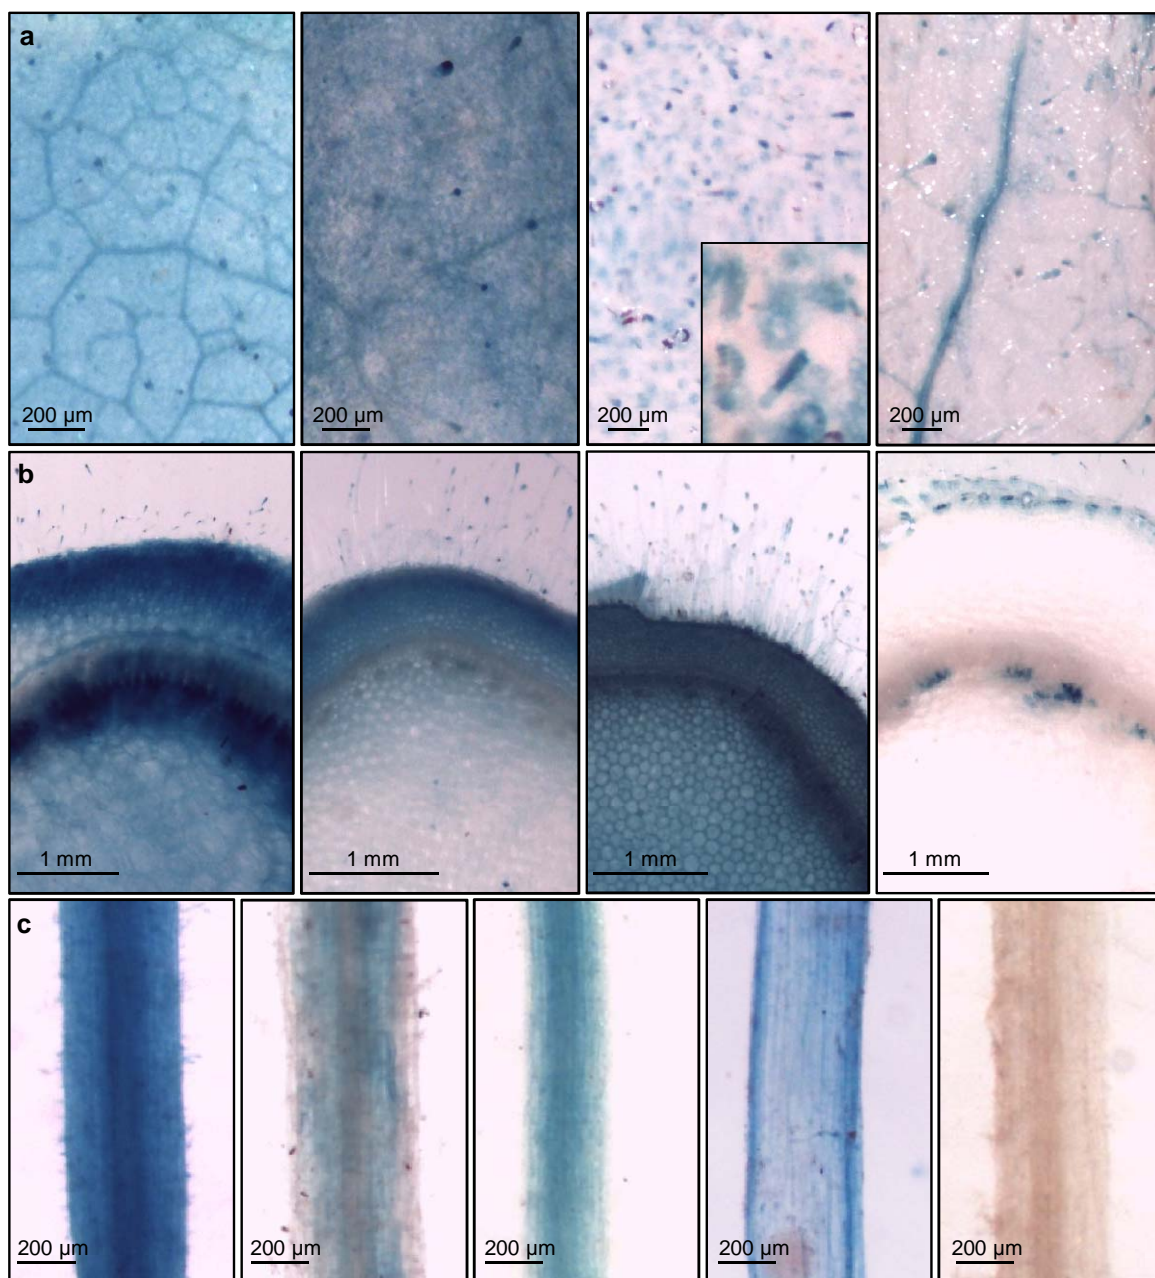

**Fig. 6** Diversity of GUS activity of different transgenic *N. tabacum* lines in leaf (a), stem (b), and root (c) tissues. GUS staining was performed in 6-week-old T1 lines.
